# Supplementary material for: Effect of temperature on structural, dynamical, and electronic properties of Sc2Te3 from first-principles calculations
Source: Royal Society of Chemistry journal article supplement (doi:10.1039/d2ra05720d), 2022-01-01
Supplement: d2ra05720d1.pdf [file d2ra05720d1.pdf]

## Supporting Information

# Effect of Temperature on Structural, Dynamical, and Electronic Properties of $\text{Sc}_2\text{Te}_3$ from First-Principles Calculations.

Getasew Mulualem Zewdie,<sup>\*,†</sup> Tekalign Terfa Debela,<sup>#</sup> and Georgies Alene Asres<sup>‡</sup>

<sup>†</sup>College of mechanical and industrial engineering, Institute of Technology, Dire-Dawa University, Dire-Dawa, Ethiopia. E-mail: [getasewmzewdie@hotmail.com](mailto:getasewmzewdie@hotmail.com)

<sup>#</sup>Institute for Application of Advanced Materials, Jeonju University, Chonju, Chonbuk 55069, Republic of Korea

<sup>‡</sup>Center for Materials Engineering, Addis Ababa Institute of Technology, School of Multi-disciplinary Engineering, Addis Ababa, 1000, Ethiopia.

\* **Correspondence** and requests for materials should be addressed to G.M.Z.

**Table S1** Average coordination numbers of different atomic pairs in the  $\text{Sc}_2\text{Te}_3$  system at 300 and 773 K.

|       |    | With Sc | With Te | Total |
|-------|----|---------|---------|-------|
| 300 K | Sc | 0.003   | 5.634   | 5.637 |
|       | Te | 3.756   | 0.003   | 3.759 |
| 773 K | Sc | 0.029   | 5.346   | 5.375 |
|       | Te | 3.564   | 0.026   | 3.590 |

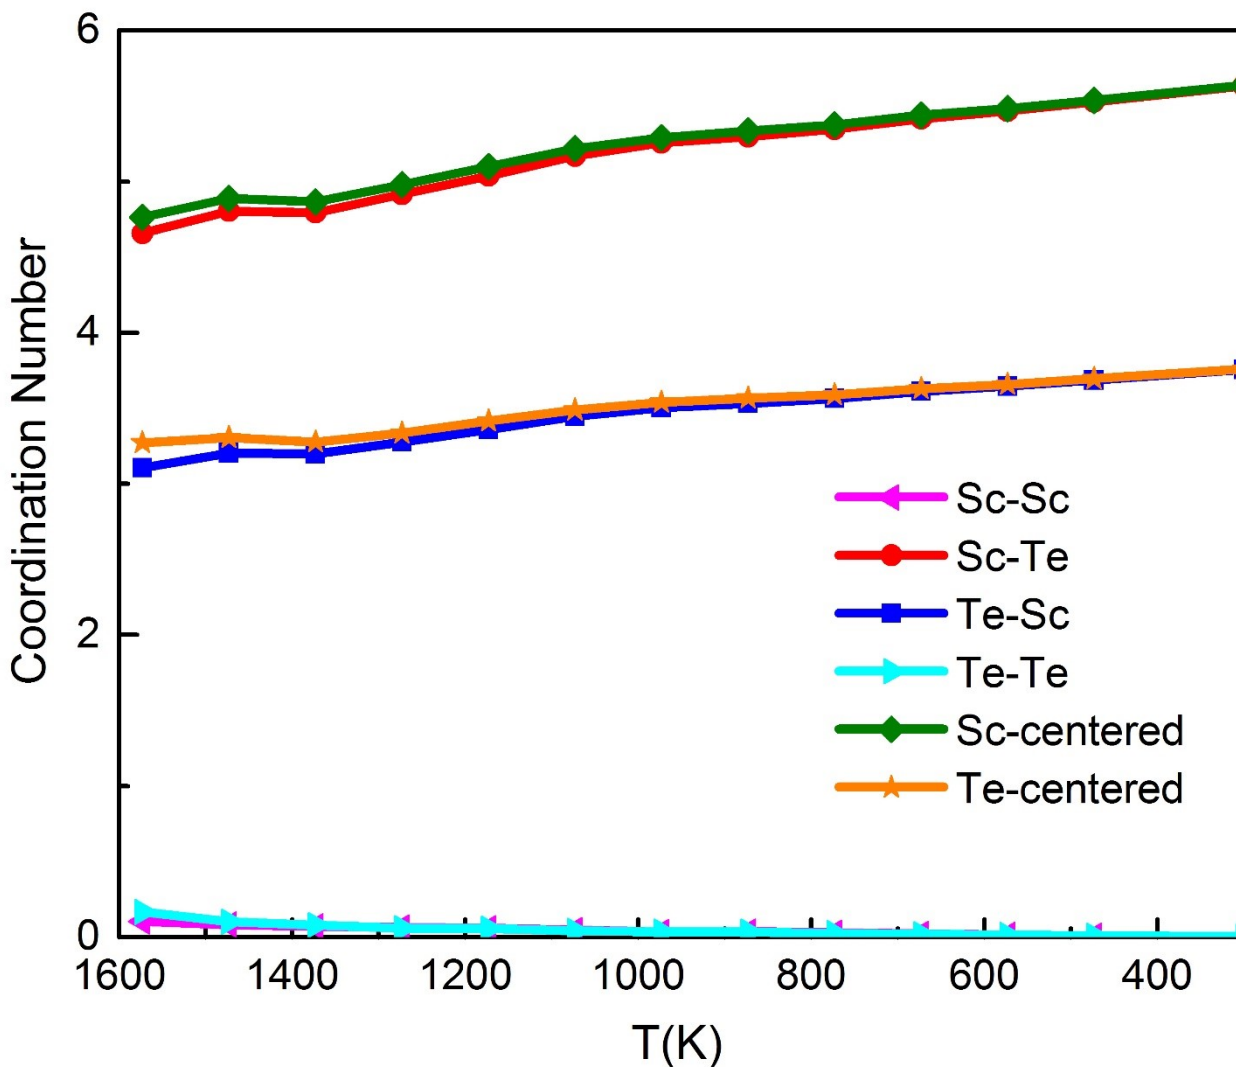

**Figure S1** The A-B partial coordination number of the  $\text{Sc}_2\text{Te}_3$  system as a function of temperatures. Here, A is the central atom and B is the coordination atom. The green and orange solid lines labeled as Sc-centered and Te-centered represent the total CNs of the Sc and Te atoms, respectively. The pink, red, blue, and cyan solid lines are labeled as Sc-Sc, Sc-Te, Te-Sc, and Te-Te partial CNs, respectively. A uniform cutoff distance of 3.3 Å is used.

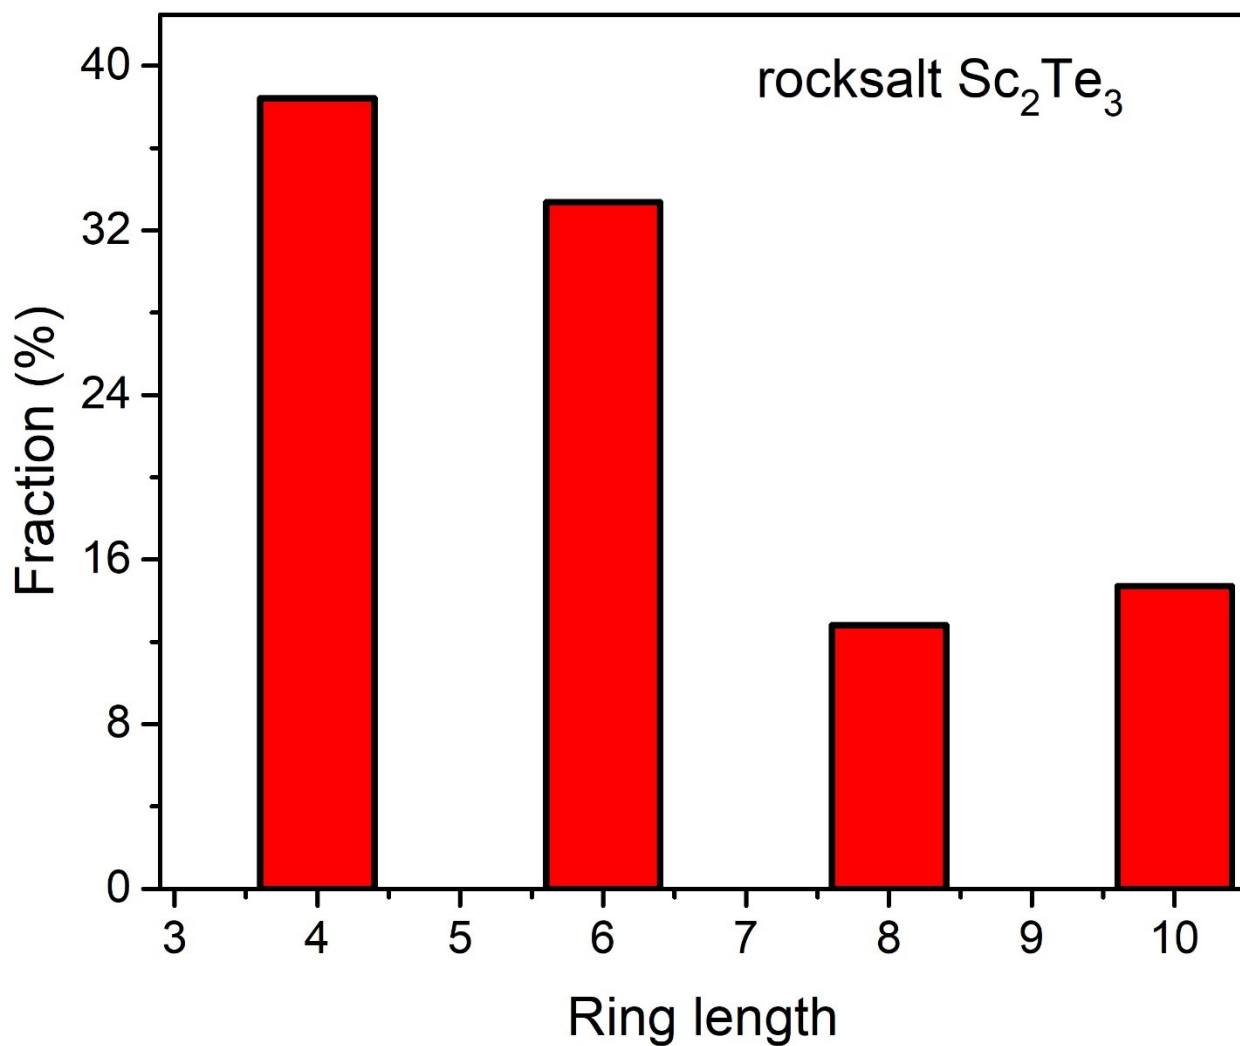

**Figure S2** The primitive ring distributions in the cubic rocksalt  $\text{Sc}_2\text{Te}_3$  structure.

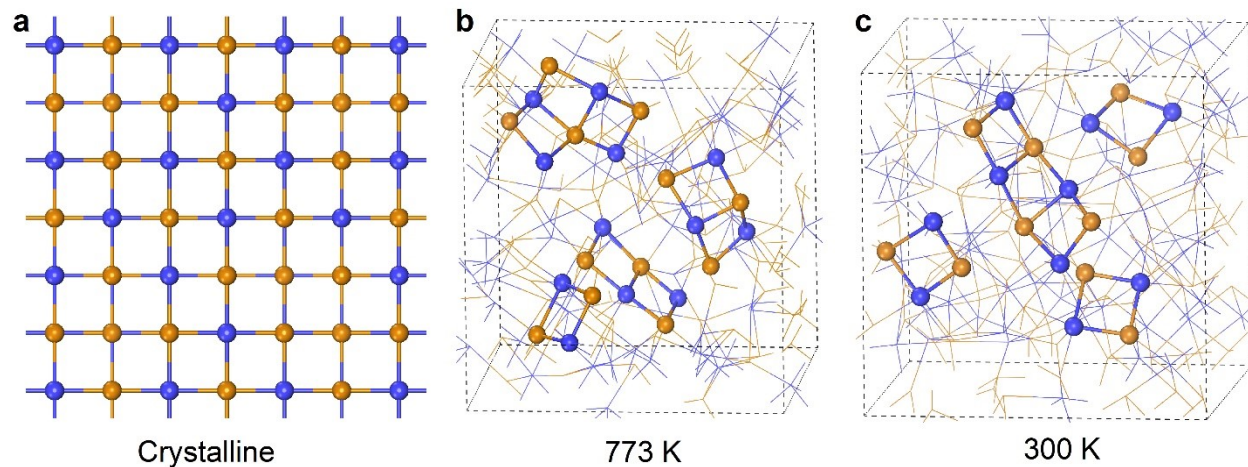

**Figure S3** (a) The rocksalt-like crystal structures of  $\text{Sc}_2\text{Te}_3$  with  $1/3$  vacancies on the cationic sub-lattice. Four-membered rings as the defining structural motifs are displayed. (b)-(c) The snapshots of typical four-membered primitive rings (ABAB squares) in the  $\text{Sc}_2\text{Te}_3$  system at 773 K and 300 K, respectively, resembling the crystalline phase. The Sc and Te atoms are rendered in blue and orange balls, respectively.

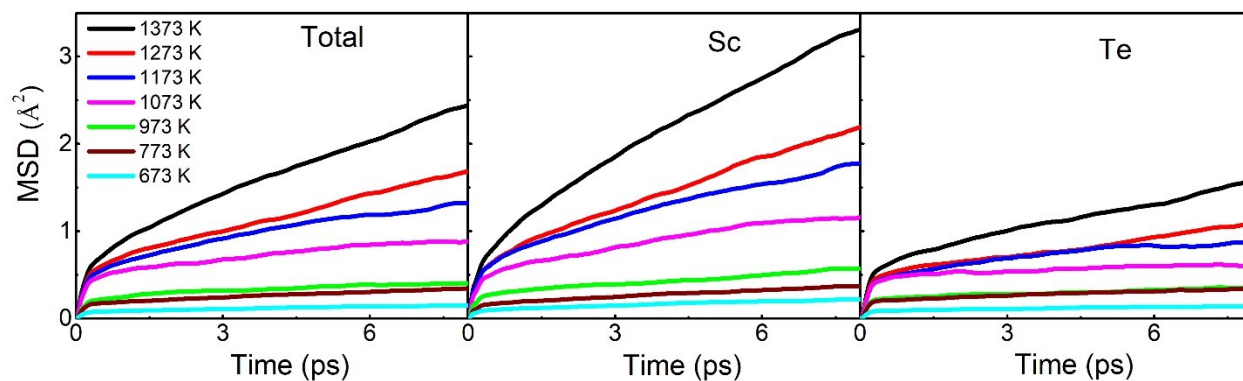

**Figure S4** The Mean-squared displacement (MSD) of the  $\text{Sc}_2\text{Te}_3$  system as a function of time at different temperatures.

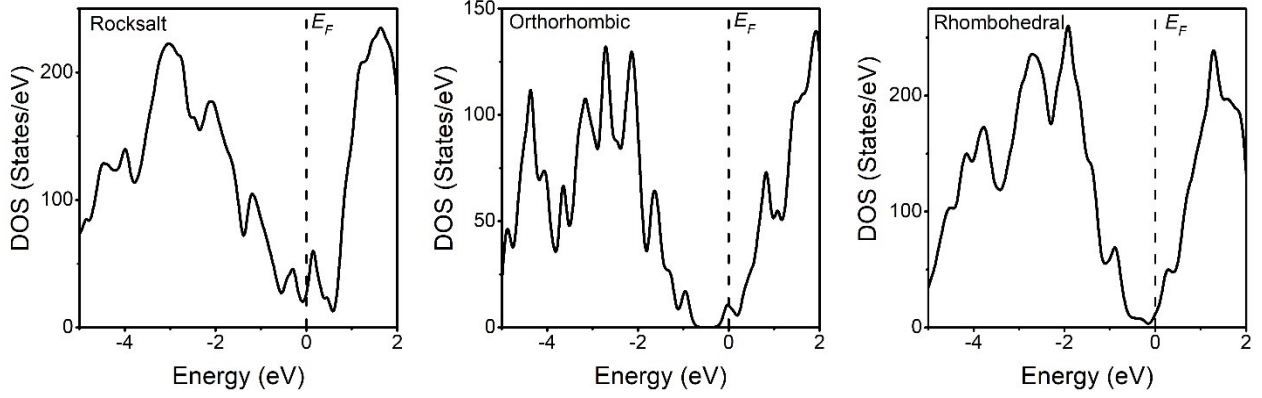

**Figure S5** The total density of states (DOS) of crystalline phases of Sc<sub>2</sub>Te<sub>3</sub> using the mBJLDA functional. (a)-(c) The total DOSs of the rocksalt, orthorhombic, and rhombohedral phases of the Sc<sub>2</sub>Te<sub>3</sub> structure, respectively. The dashed vertical line is the Fermi level ( $E_F$ ), corresponding to the zero point energy.
